# Supplementary material for: The association between the use of biomedical services and the holistic use of traditional East Asian medicine: a national survey of outpatients in South Korea
Source: PubMed Central journal article supplement — BMJ Open. 2017 Dec 6;7(12):e018414. doi: 10.1136/bmjopen-2017-018414 (PMC5728304; doi:10.1136/bmjopen-2017-018414), 2017-12-06
Supplement: bmjopen-2017-018414.draft_revisions.pdf [file bmjopen-2017-018414.draft_revisions.pdf]

# BMJ Open

BMJ Open is committed to open peer review. As part of this commitment we make the peer review history of every article we publish publicly available.

When an article is published we post the peer reviewers' comments and the authors' responses online. We also post the versions of the paper that were used during peer review. These are the versions that the peer review comments apply to.

The versions of the paper that follow are the versions that were submitted during the peer review process. They are not the versions of record or the final published versions. They should not be cited or distributed as the published version of this manuscript.

BMJ Open is an open access journal and the full, final, typeset and author-corrected version of record of the manuscript is available on our site with no access controls, subscription charges or pay-per-view fees (<http://bmjopen.bmj.com>).

If you have any questions on BMJ Open's open peer review process please email [editorial.bmjopen@bmj.com](mailto:editorial.bmjopen@bmj.com)

# BMJ Open

## The Association between the Use of Biomedical Services and the Holistic Use of Traditional East Asian Medicine among Outpatients in Korea

|                                 |                                                                                                |
|---------------------------------|------------------------------------------------------------------------------------------------|
| Journal:                        | <i>BMJ Open</i>                                                                                |
| Manuscript ID                   | bmjopen-2017-018414                                                                            |
| Article Type:                   | Research                                                                                       |
| Date Submitted by the Author:   | 28-Jun-2017                                                                                    |
| Complete List of Authors:       | Shim, Jae-Mahn; University of Seoul, Sociology<br>Lee, Yun-Suk; University of Seoul, Sociology |
| <b>Primary Subject Heading</b>: | Complementary medicine                                                                         |
| Secondary Subject Heading:      | Sociology, Health services research, Public health                                             |
| Keywords:                       | holism, co-utilization, East Asian medicine, Korea, utilization behavior, institutionalization |
|                                 |                                                                                                |

SCHOLARONE™  
Manuscripts

only

1  
2  
3  
4 **The Association between the Use of Biomedical Services and the Holistic Use of**  
5 **Traditional East Asian Medicine among Outpatients in Korea**  
6  
7

8  
9 **Authors**

10  
11 1. Jae-Mahn Shim, Ph.D. (\*Corresponding author)

12 Department of Sociology

13 University of Seoul

14 163 Seoulsiripdaero, Dongdaemungu

15 Seoul 130-742, Korea

16 Email: jaemahn.shim@gmail.com

17 Phone: +82-2-6490-2743

18 Fax: +82-2-6490-2734

19  
20  
21  
22  
23 2. Yun-Suk Lee, Ph.D.

24 Department of Sociology

25 University of Seoul

26 163 Seoulsiripdaero, Dongdaemungu

27 Seoul 130-742, Korea

28 Email: yslee@uos.ac.kr

29  
30  
31  
32 **Keywords:** holism; co-utilization; East Asian medicine; Korea; utilization behavior

33  
34  
35 **Word count:** 3,560

## Abstract

**Objectives:** The holistic use of a system of complementary and alternative medicine (CAM) is potentially linked to its treatment outcomes. This paper examines how the use of biomedicine is associated with the holistic use of CAM, focusing on traditional East Asian medicine (EM) that is uniquely integrated in the medical system in Korea.

**Design/Settings:** A representative national sample of EM outpatients in Korea.

**Participants:** 3,861 respondents to a national survey.

**Methods:** By using the 2011 Korean National Survey of EM Patients, ordered logistic regression models specify the relationship between EM outpatients' use of biomedicine and their holistic use of EM modalities.

**Results:** Among EM outpatients who used at least one EM modality in the past three months, people who used two (33.3%) or three (29.4%) modalities together are the two greatest in number, followed by users of four (18.1%), five (7.2%), six (2.1%), and seven (0.6%) modalities. Among these EM outpatients, 42.5% used biomedical services as well during the same period. The odds for EM users to use EM holistically are 17% greater among EM users who used biomedicine as well, compared to EM users who did not use biomedicine.

**Conclusions:** Health care community should recognize that CAM use likely becomes holistic as people use biomedicine concomitantly, when the practice rights over a CAM system are comprehensively and exclusively entitled to a group of CAM professionals who are independent from practitioners of biomedicine.

### [Strengths and limitations of this study]

- It uses a national sample of EM users who visited EM facilities across Korea.
- It specifies several multivariate ordered logistic regression models to support the findings.
- All the measures are based upon self-reports of survey participants.

## Introduction

The presence of complementary and alternative medicine (CAM) is substantial in contemporary health care systems around the world.<sup>1,2</sup> Accordingly, the health care community is concerned with the ways in which CAM is integrated in the mainstream biomedicine<sup>3,4</sup> and health care outcomes that CAM produces. Over 40 systematic reviews of CAM trials are currently registered in the Cochrane Library and debate the safety and efficacy of CAM. In addition, studies suggest that CAM services be provided holistically in medical trials as well as real-world practices so that CAM users can utilize all the related treatment modalities within a whole system of CAM.<sup>5,6</sup> It is argued that the holistic utilization of various treatment modalities within a CAM system can maximize the treatment effects of CAM, compared to the selective and fragmented use of only some modalities of the whole system.<sup>7</sup> In these studies, the holistic use of a CAM system refers to the utilization behavior of CAM users who use two or more treatment modalities that constitute the CAM system.<sup>8</sup> In contrast, the selective and fragmented use refers to the utilization behavior of CAM users who use a certain modality of the CAM system and not others.

While the therapeutic effectiveness of the holistic use of CAM still needs to be adjudicated by more research, this paper attends to the possibility that CAM is institutionalized in some countries in a way that prevents the users from its holistic use. For example, the treatment modalities that together form a whole system of traditional East Asian medicine (EM), such as acupuncture, moxibustion, cupping, herbal remedies, and acupressure, are disconnected from one another in the Japanese medical system so that only herbal remedies are selectively incorporated into the practices of biomedical doctors;<sup>9-13</sup> acupuncture and acupressure are

1  
2  
3  
4 each relegated as pseudo-medicine to medical technicians, such as acupuncturists and  
5  
6  
7  
8  
9  
10  
11  
12  
13  
14  
15  
16  
17  
18  
19  
20  
21  
22  
23  
24  
25  
26  
27  
28  
29  
30  
31  
32  
33  
34  
35  
36  
37  
38  
39  
40  
41  
42  
43  
44  
45  
46  
47  
48  
49  
50  
51  
52  
53  
54  
55  
56  
57  
58  
59  
60

each relegated as pseudo-medicine to medical technicians, such as acupuncturists and  
massage therapists who are permitted to practice only acupuncture and massage therapies.  
These technicians are not allowed to practice herbal remedies or other EM modalities. Similar  
observations are made that the otherwise rich practices of acupuncture are truncated and  
simplified in the dominant biomedical health care systems in the U.S.<sup>14-16</sup> and the U.K.<sup>17</sup> In  
the contemporary French biomedical system, a variety of CAM systems are reported to  
become “balkanized” and their constituent treatment modalities are torn apart from one  
another in practice.<sup>18</sup> These studies together demonstrate that the intersection of a CAM  
system with biomedicine can result in the fragmented and partial use of the CAM system.

In other countries, on the other hand, treatment modalities within a CAM system are held  
together and institutionalized comprehensively into the national medical systems. For  
example, several treatment modalities within EM are recognized as legitimate medicine in  
China, Taiwan, and Korea, equivalent to biomedicine.<sup>3,19-25</sup> These countries feature  
distinctive systems of education and licensure for EM doctors who are legally permitted to  
practice the whole range of modalities of EM, independent from medical doctors of  
biomedicine. The EM doctors in Taiwan and Korea even hold the right to practice all the EM  
modalities in such an exclusive way that doctors of biomedicine do not hold the right to  
practice any of the EM modalities. Reciprocally, these EM doctors are not allowed to practice  
biomedicine. In China, however, biomedical doctors are allowed to practice any EM  
modalities as the doctors deem necessary for medical treatments. In return, EM doctors are  
entitled to practice biomedicine as well. These countries show that a whole system of CAM is  
institutionalized within the dominant biomedical system in several different ways.

1  
2  
3  
4 Drawing on the literature of medical systems, this paper posits that these institution-level  
5 variations are consequential for the extent to which CAM users utilize various treatment  
6 modalities of a CAM system. The paper then examines users' utilization behavior by looking  
7 at the extent to which CAM users utilize multiple treatment modalities within a CAM system  
8 holistically. In accordance with previous studies,<sup>5-8</sup> the holistic use is defined as CAM users'  
9 utilization behavior in which two or more treatment modalities of a CAM system are used  
10 together rather than a single modality being used in isolation from the other modalities. When  
11 a user resorts to more modalities, its behavior is interpreted to be more holistic. The paper  
12 pursues this investigation by examining the case of EM that is one of the popular CAM  
13 practices in the world. In particular, it develops a specific hypothesis that elaborates the  
14 unique institutional condition of EM in Korea and relates it to the utilization behavior of EM  
15 users who may also use biomedical services concomitantly in the Korean health care system.  
16 Therefore, the hypothesis focuses on how the use of biomedical services is associated with  
17 the holistic use of EM in the Korean context.  
18  
19  
20  
21  
22  
23  
24  
25  
26  
27  
28  
29  
30  
31  
32  
33  
34  
35  
36

37 In Korea, the professional practice of EM is comprehensively and exclusively entitled to EM  
38 doctors in separation from the professional practice of biomedicine by medical doctors. This  
39 comprehensive sanction of all treatment modalities of EM within the medical system and, at  
40 the same time, the exclusive entitlement of the practice rights of these modalities only to EM  
41 doctors (and not biomedical doctors) likely project EM to Korean medical service users as a  
42 system of medical practices that is very different and independent from biomedicine. EM can  
43 be also viewed as a whole medical system that is composed of a variety of related treatment  
44 modalities that are readily available for the needs of medical service users. In this  
45 institutional condition, EM users who co-utilize biomedical services as well are likely those  
46  
47  
48  
49  
50  
51  
52  
53  
54  
55  
56  
57  
58  
59  
60

1  
2  
3  
4 who search for diverse medical resources of different kinds that the national medical system  
5 provides for them. These EM users, when compared to EM users who do not use biomedical  
6 services and thus do not seek for diverse medical resources, are likely to seek even more  
7  
8 diverse modalities that are available within EM itself. Therefore, this paper hypothesizes that  
9  
10 the EM users who also use biomedical services are likely to use EM more holistically.  
11  
12  
13

14  
15  
16  
17 *Hypothesis: Among EM users in Korea where certified EM professionals hold the*  
18 *comprehensive and exclusive practice rights over EM, medical service users' use of*  
19 *biomedical services is positively associated with their likelihood of using EM holistically.*  
20  
21  
22  
23  
24

## 25 26 **Methods**

27  
28  
29  
30 Data come from the 2011 Korean National Survey of EM Patients (NSEMP) that was  
31 administered to a nationally representative sample of patients who visited (i.e. outpatients) or  
32 were hospitalized (i.e. inpatients) in an EM facility as of September 2011. This survey used  
33 the national sampling frame of 12,250 EM facilities that were registered in the national health  
34 insurance system. This sampling frame was duly regarded as the national population of EM  
35 facilities in Korea, since all medical service providers should be registered in the national  
36 insurance system for reimbursement from the national government in the universal Korean  
37 health care system. The survey then drew a stratified systematic sample of 471 EM facilities  
38 (4% of the sampling frame). At each selected facility, the outpatient questionnaire of the  
39 survey was administered to a random sample of 9 outpatients drawn from people in the  
40 waiting area. When the facility was equipped with hospital beds, an additional random  
41 sample of 8 inpatients was drawn from the list of inpatients and these inpatients participated  
42  
43  
44  
45  
46  
47  
48  
49  
50  
51  
52  
53  
54  
55  
56  
57  
58  
59  
60



1  
2  
3  
4 in the inpatient questionnaire. As a result, 3,926 outpatients and 1,581 inpatients participated  
5  
6 in the survey.  
7  
8  
9

10 This paper analyzes only the responses from the outpatient EM users and not those from the  
11  
12 inpatient users, since only the outpatient questionnaire investigated the uses of EM in each of  
13  
14 the seven different EM modalities in detail; the inpatient questionnaire investigated whether a  
15  
16 respondent ever used any of the EM modalities without differentiating which modality was  
17  
18 used. These inpatient responses are ignorant of which and how many EM modalities were  
19  
20 used and, thus, how holistic the EM use was. As a result, the following analysis includes  
21  
22 responses from the final sample of 3,861 outpatient EM users. Its difference from the total  
23  
24 outpatient participants ( $65 = 3,926 - 3,861$ ) is due to a further exclusion of 65 inpatient  
25  
26 respondents that are missing values in one or more of the variables that are included in the  
27  
28 following analysis.  
29  
30  
31  
32  
33  
34

35 The dependent variable, *the holistic use of EM*, is an ordinal variable that measures the  
36  
37 number of different EM modalities that were used together by a respondent in the past three  
38  
39 months. It is a composite measure that summarizes responses to seven distinct questions.  
40  
41 Each of the seven questions asked whether a respondent used one of the seven EM modalities  
42  
43 respectively (“have you used [a specific EM modality] for medical problems in the past three  
44  
45 months?”), such as 1) herbal extracts, 2) herbal pills/powders, 3) acupuncture, 4) moxibustion,  
46  
47 5) cupping, 6) chuna, and 7) manual treatments. The response to each question is coded 1 if  
48  
49 yes (0 if not). Thus, the values of the dependent variable range from 1 to 7. The focal  
50  
51 independent variable is *the use of biomedical services* which measures whether a respondent  
52  
53 visited a biomedical clinic or hospital where biomedical doctors provide medical services for  
54  
55  
56  
57  
58  
59  
60

1  
2  
3  
4 the medical conditions for which the respondent used EM modalities. It is coded 1 if a  
5  
6 respondent visited a biomedical clinic or hospital in the past (0 if not).  
7  
8  
9

10  
11 [Table 1]  
12  
13

14  
15 A set of potential covariates, which may intervene in the relationship between holistic EM  
16  
17 use and the use of biomedical services, are incorporated in the analysis as control variables.  
18  
19 These control variables are the frequency of EM use, self-rated health status, gender, age,  
20  
21 marital status, the highest level of education, and monthly household income (Table 1 for  
22  
23 descriptive statistics). This paper uses ordered logistic regression models to test the  
24  
25 hypothesis about the relationship between holistic EM use and the use of biomedical services,  
26  
27 since it interprets different values in the dependent variable as ordered categories that refer to  
28  
29 the extent of holistic EM use. Results from negative binomial regression models, which treat  
30  
31 the dependent variable as a count measure, agree with the results reported here. For  
32  
33 comparison, results from negative binomial regression models are reported in Table A1 in the  
34  
35 Appendix.  
36  
37  
38  
39

## 40 41 42 **Results** 43 44 45

46 Among all current outpatient EM users who used at least one EM modality in the past three  
47  
48 months, EM users who used two or three modalities are the two greatest in number, followed  
49  
50 by those who used four, five, six, and seven modalities. The proportion of EM users who  
51  
52 used only one modality is only 9.4%. It turns out that more than 90% of current EM  
53  
54 outpatients in Korea used multiple EM modalities together when they ever resorted to EM.  
55  
56  
57  
58  
59  
60

1  
2  
3  
4  
5  
6 Close to a half of these EM users (42.5%) also used biomedical services by visiting a  
7  
8 biomedical clinic or hospital. In addition, the bivariate tabulation on the relationship between  
9  
10 the extent of holistic EM use and the use of biomedical services shows that there is a positive  
11  
12 relationship between the two; EM users who utilized various EM modalities more holistically  
13  
14 were more likely to use biomedical services as well (Table 2). Put differently, EM users who  
15  
16 also used biomedical services were more likely to utilize EM modalities holistically than EM  
17  
18 users who did not use biomedical services.  
19  
20

21  
22  
23  
24 [Table 2]  
25  
26

27  
28 [Table 3]  
29  
30

31  
32 Model 1 in Table 3 puts this bivariate association in odds ratio and finds it to be statistically  
33  
34 significant. The odds for EM users who also used biomedical services to utilize EM  
35  
36 holistically are greater than those for EM users who did not use biomedical services  
37  
38 (OR=1.27; 95% CI=1.13–1.42). The following two models show that this association remains  
39  
40 the same when respondents' frequency of EM use is controlled (Model 2) or when  
41  
42 respondents' health status is controlled (Model 3). The final Model 4 incorporates these two  
43  
44 confounders together and other possible confounders as control variables; the positive  
45  
46 association between holistic EM use and the use of biomedical services still persists. In this  
47  
48 final model, the odds for EM users who also used biomedicine to use EM holistically are  
49  
50 17% greater than those for EM users who did not use biomedicine (OR=1.17; 95% CI=1.04–  
51  
52 1.31). These results support the hypothesis unambiguously.  
53  
54  
55  
56  
57

## Discussion

To our knowledge, this is the first study in the global medical community that examines how the use of biomedical services is associated with the extent to which the users of CAM, involving EM, utilize various modalities of a CAM system holistically. It is surprising that this line of inquiry has been neglected in the literature, in spite of a potential link between the holistic-vs-selective utilization of a CAM system and its varying health care outcomes. While awaiting more empirical evidence on this link, this paper contributes to developing a much-needed analytical perspective that elaborates CAM utilization behavior beyond existent studies of the simple utilization rate and popularity of CAM among various populations.<sup>25-31</sup>

As such, this perspective has grown out of a group of studies that investigate the complementary-versus-substitutive relationship between CAM use and biomedicine use.<sup>23,32-</sup>

<sup>35</sup> Whereas these existing studies have investigated whether the utilization of fragmented CAM modalities increases or decreases the utilization of biomedical services by comparing the behavior of CAM users to the behavior of non-users, this paper originally focuses on CAM users only and investigates how their CAM utilization behavior is shaped by their use (vs. non-use) of biomedical services. In this sense, this paper provides CAM-centered evidence to the complementarity-versus-substitution debate; its finding suggests that CAM use can be complementary to biomedicine to the extent that users rely on a variety of treatment modalities within a CAM system even when they use biomedical services (i.e. the holistic co-utilization of CAM).

## Conclusions

This finding is based upon the experiences of EM users in Korea where the professional practice of EM is comprehensively and exclusively entitled to EM doctors. It will take more research to generalize this finding in other institutional contexts and, at the same time, to discern any cross-national differences. The qualifications and characterizations that this paper has developed regarding the Korean medical system will certainly serve future research interest in this direction. A comparative study between the East Asian countries, such as China, Korea, and Japan where EM originated and is institutionalized differently, will shed more light.

The authors recommend that the CAM-centered perspective, asking how CAM use is reconstructed by biomedicine use, is especially relevant to studying CAM utilization behavior in societies where a system of CAM treatment modalities has existed for quite some time (e.g. traditional Indian medicine in the U.S., traditional African medicine in Africa, Ayurveda and Indian medical traditions in India, etc.). The international medical community will gain a lot from these future studies on their own accord. It will gain even more from these studies when the link between the holistic-versus-selective use of CAM and its varying health care outcomes is examined further.

## Appendix

[Table A1]

### **Contributorship Statement**

JMS conceived the study, analyzed the data, and wrote the manuscript. YSL conceived the study and helped modify the data analysis and revise the manuscript.

### **Acknowledgements**

This work was supported by the 2014 Research Fund of the University of Seoul. The views in this paper are the authors' and should not be interpreted as those of the supporter. The authors thank Keith Woogerd for his copyediting the manuscript.

### **Competing Interests**

The authors declared no potential conflicts of interest with respect to the research, authorship, and/or publication of this article.

### **Funding**

The first and corresponding author received financial support from the University of Seoul for data analysis and manuscript writing.

### **Data Sharing Statement**

The data will be available from the corresponding author upon request.

## References

1. WHO. *WHO Traditional Medicine Strategy 2014-2023*. World Health Organization;2013.
2. Bodeker G, Ong C-K, Grundy C, Burford G, Shein K. *WHO Global Atlas of Traditional, Complementary and Alternative Medicine*. Kobe, Japan: WHO Centre for Health Development; 2005.
3. Xu J, Yang Y. Traditional Chinese Medicine in the Chinese Health Care System. *Health Policy*. 2009;90(2-3):133-139.
4. Kaboru BB, Falkenberg T, Ndulo J, Muchimba M, Solo K, Faxelid E. Communities' Views on Prerequisites for Collaboration between Modern and Traditional Health Sectors in Relation to STI/HIV/AIDS Care in Zambia. *Health Policy*. 2006;78(2-3):330-339.
5. MacPherson H, Nahin R, Paterson C, Cassidy CM, Lewith GT, Hammerschlag R. Developments in Acupuncture Research: Big-picture Perspectives from the Leading Edge. *J Altern Complement Med*. 2008;14(7):883-887.
6. Ritenbaugh C, Verhoef M, Fleishman S. Whole Systems Research: A Discipline for Studying Complementary and Alternative Medicine. *Altern Ther Health Med*. 2003;9:32-36.
7. Cao Y, Zhan H, Pang J, et al. Individually Integrated Traditional Chinese Medicine Approach in the Management of Knee Osteoarthritis: Study Protocol for a Randomized Controlled Trial. *Trials*. 2011;12:160.
8. Shim J-M, Kim J. Cross-national Differences in the Holistic Use of Traditional East Asian Medicine in East Asia. *Health Promot Int*. 2016. Doi: 10.1093/heapro/daw089.

- 1  
2  
3  
4 9. Lock M. *East Asian Medicine in Urban Japan: Varieties of Medical Experience*. Vol  
5 no. 4. Berkeley: University of California Press; 1980.  
6  
7
- 8  
9 10. Lock M. The Organization and Practice of East Asian Medicine in Japan: Continuity  
10 and Change. *Soc Sci Med*. 1980;14B(4):245-253.  
11
- 12  
13 11. Katayama K, Yoshino T, Munakata K, et al. Prescription of Kampo Drugs in the  
14 Japanese Health Care Insurance Program. *Evid Based Complement Alternat Med*.  
15 2013;2013:576973.  
16  
17
- 18  
19 12. Kobayashi A, Uefuji M, Yasumo W. History and Progress of Japanese Acupuncture.  
20 *Evid Based Complement Alternat Med*. 2010;7(3):359-365.  
21
- 22  
23 13. Tsutani K. The Evaluation of Herbal Medicines: an East Asian Perspective. In:  
24 Lewith GT, Aldridge D, eds. *Clinical Research Methodology for Complementary*  
25 *Therapies*. London: Hodder & Stoughton; 1993:365-393.  
26  
27
- 28  
29 14. Barnes LL. The Acupuncture Wars: the Professionalizing of American Acupuncture.  
30 *Med Anthropol*. 2003;22(3):261-301.  
31  
32
- 33  
34 15. Wolpe PR. The Maintenance of Professional Authority: Acupuncture and the  
35 American Physician. *Soc Probl*. 1985;32(5):409-424.  
36  
37
- 38  
39 16. Braverman C, Baker C, Harris R. Acupuncture and Oriental Medicine (AOM) in the  
40 United States. *Am Acupuncturist*. 2009;47:22-26.  
41  
42
- 43  
44 17. Givati A, Hatton K. Traditional acupuncturists and higher education in Britain: The  
45 dual, paradoxical impact of biomedical alignment on the holistic view. *Soc Sci Med*.  
46 2015;131:173-180.  
47  
48
- 49  
50 18. Ramsey M. Alternative Medicine in Modern France. *Medical Hist*. 1999;43(3):286.  
51  
52  
53  
54  
55  
56  
57  
58  
59  
60



- 1  
2  
3  
4 19. Holliday I. Traditional Medicines in Modern Societies: An Exploration of  
5  
6 Integrationist Options through East Asian Experience. *J Med Philos.* 2003;28(3):373-  
7  
8 389.  
9
- 10  
11 20. Yoon K-J, Kim D-S. *Ui-Hanui Kongsangbalchunul Wihan Tonghapchok*  
12  
13 *Chopkeunbangsik Mosaek (Ways of Integrating Oriental Medicine and Western*  
14  
15 *Medicine)*. Korea Institute of Health and Social Affairs;2013.  
16
- 17  
18 21. Xu H, Chen K. Integrative Medicine: the Experience from China. *J Altern*  
19  
20 *Complement Med.* 2008;14(1):3-7.  
21
- 22  
23 22. Shin D. How Four Different Political Systems Have Shaped the Modernization of  
24  
25 Traditional Korean Medicine between 1900 and 1960. *Hist Sci.* 2008;17(3):225-241.  
26
- 27  
28 23. Shim J-M. The Relationship Between the Use of Complementary and Alternative  
29  
30 Medicine and the Use of Biomedical Services: Evidence From East Asian Medical  
31  
32 Systems. *Asia Pac J Public Health.* 2016;28(1):51-60.  
33
- 34  
35 24. Yu F, Takahashi T, Moriya J, et al. Traditional Chinese Medicine and Kampo: a  
36  
37 Review from the Distant Past for the Future. *J Int Med Res.* 2006;34(3):231-239.  
38
- 39  
40 25. Frass M, Strassl RP, Friehs H, Müllner M, Kundi M, Kaye AD. Use and Acceptance  
41  
42 of Complementary and Alternative Medicine Among the General Population and  
43  
44 Medical Personnel: A Systematic Review. *Ochsner J.* 2012;12(1):45-56.  
45
- 46  
47 26. Harris PE, Cooper KL, Relton C, Thomas KJ. Prevalence of Complementary and  
48  
49 Alternative Medicine (CAM) Use by the General Population: a Systematic Review  
50  
51 and Update. *Int J Clin Pract.* 2012;66(10):924-939.  
52
- 53  
54 27. Wai WT, Lan WS, Donnan SPB. Prevalence and Determinants of the Use of  
55  
56 Traditional Chinese Medicine in Hong Kong. *Asia Pac J Public Health.*  
57  
58 1995;8(3):167-170.  
59  
60

- 1  
2  
3  
4 28. Chen FP, Chen TJ, Kung YY, et al. Use Frequency of Traditional Chinese Medicine  
5 in Taiwan. *BMC Health Serv Res.* 2007;7:26.  
6  
7  
8  
9 29. Hori S, Mihaylov I, Vasconcelos J, McCoubrie M. Patterns of Complementary and  
10 Alternative Medicine Use amongst Outpatients in Tokyo, Japan. *BMC Complement*  
11 *Altern Med.* 2008;8(1):14.  
12  
13  
14 30. Hong CD. Complementary and Alternative Medicine in Korea: Current Status and  
15 Future Prospects. *J Altern Complement Med.* 2001;7(6):33-40.  
16  
17  
18 31. Jin L. From Mainstream to Marginal? Trends in the Use of Chinese Medicine in  
19 China from 1991 to 2004. *Soc Sci Med.* 2010;71(6):1063-1067.  
20  
21  
22 32. Druss BG, Rosenheck RA. Association Between Use of Unconventional Therapies  
23 and Conventional Medical Services. *JAMA.* 1999;282(7):651-656.  
24  
25  
26 33. van Gameren E. Health Insurance and Use of Alternative Medicine in Mexico. *Health*  
27 *Policy.* 2010;98(1):50-57.  
28  
29  
30 34. Ayers SL, Kronenfeld JJ. Delays in Seeking Conventional Medical Care and  
31 Complementary and Alternative Medicine Utilization. *Health Serv Res.*  
32 2012;47(5):2081-2096.  
33  
34  
35 35. Pagán JA, Pauly MV. Access to Conventional Medical Care and the Use of  
36 Complementary and Alternative Medicine. *Health Aff.* 2005;24(1):255-262.  
37  
38  
39  
40  
41  
42  
43  
44  
45  
46  
47  
48  
49  
50  
51  
52  
53  
54  
55  
56  
57  
58  
59  
60

Table 1. Descriptive Statistics<sup>1)</sup> of Variables Used (N=3,861)

| Variable                       | N     | %    | Variable                   | N     | %    |
|--------------------------------|-------|------|----------------------------|-------|------|
| The Holistic Use of EM         |       |      | Age                        |       |      |
| 1                              | 363   | 9.4  | less than 20               | 143   | 3.7  |
| 2                              | 1,284 | 33.3 | 20s or 30s                 | 894   | 23.2 |
| 3                              | 1,135 | 29.4 | 40s                        | 762   | 19.7 |
| 4                              | 699   | 18.1 | 50s                        | 833   | 21.6 |
| 5                              | 276   | 7.2  | 60s                        | 575   | 14.9 |
| 6                              | 82    | 2.1  | 70s                        | 522   | 13.5 |
| 7                              | 22    | 0.6  | 80s or more                | 132   | 3.4  |
| The Use of Biomedical Services |       |      | Marital Status             |       |      |
| Yes                            | 1,641 | 42.5 | Single                     | 613   | 15.9 |
| No                             | 2,220 | 57.5 | Married                    | 2,783 | 72.1 |
| EM Use Frequency <sup>2)</sup> |       |      | Widowed/Divorced/Separated |       |      |
| 1 to 3 times                   | 1,389 | 36.0 | Others                     | 440   | 11.4 |
| 4 to 10 times                  | 1,289 | 33.4 | Education                  |       |      |
| 11 to 30 times                 | 885   | 22.9 | No formal education        | 279   | 7.2  |
| 30 times or more               | 298   | 7.7  | Elementary school          | 557   | 14.4 |
| Self-Rated Health Status       |       |      | Middle school              | 467   | 12.1 |
| Very bad                       | 103   | 2.7  | High school                | 1,215 | 31.5 |
| Bad                            | 1,010 | 26.2 | College or graduate school | 1,343 | 34.8 |
| Fair                           | 1,651 | 42.8 | Household Income           |       |      |
| Good                           | 983   | 25.5 | less than 1 million wons   | 733   | 19.0 |
| Very good                      | 114   | 3.0  | 1 to 1.9 million wons      | 789   | 20.4 |
| Gender                         |       |      | 2 to 2.9 million wons      | 831   | 21.5 |
| Male                           | 1,161 | 30.1 | 3 to 3.9 million wons      | 615   | 15.9 |
| Female                         | 2,700 | 69.9 | 4 to 4.9 million wons      | 446   | 11.6 |
|                                |       |      | 5 million wons or more     | 447   | 11.6 |

Note: <sup>1)</sup> The socio-demographic characteristics of EM users show that EM is being used very widely across different social groups in age, education, and income. <sup>2)</sup> This refers to how many times a respondent has used EM services in the past three months. It is certain that, when a respondent uses EM less often, the respondent is less likely to use different treatment modalities of EM. However, a respondent who uses EM very often does not necessarily utilize different treatment modalities (e.g. a respondent who uses only acupuncture many times).

Table 2. The Bivariate Association between the Use of Biomedical Services and the Holistic Use of Traditional East Asian Medicine (EM)

|                           | The Use of Biomedical Services |              |             |               |
|---------------------------|--------------------------------|--------------|-------------|---------------|
|                           | No                             | Yes          | Total       |               |
| The Holistic Use of EM    | 1                              | 227 (62.5)   | 136 (37.5)  | 363 (100.0)   |
| (# of EM Modalities Used) | 2                              | 766 (59.7)   | 518 (40.3)  | 1284 (100.0)  |
|                           | 3                              | 654 (57.6)   | 481 (42.4)  | 1135 (100.0)  |
|                           | 4                              | 389 (55.6)   | 310 (44.4)  | 699 (100.0)   |
|                           | 5                              | 138 (50.0)   | 138 (50.0)  | 276 (100.0)   |
|                           | 6                              | 39 (47.6)    | 43 (52.4)   | 82 (100.0)    |
|                           | 7                              | 7 (31.8)     | 15 (68.2)   | 22 (100.0)    |
| Total                     |                                | 2,220 (57.5) | 1641 (42.5) | 3,861 (100.0) |

Note: Percentages in parentheses. Pearson's  $\chi^2$  (6) = 22.8001; p-value = 0.001.

For peer review only

Table 3. Ordered Logistic Regression Models of Holistic EM Use upon the Use of Biomedical Services and Other Covariates

|                                                  | Model 1 |             | Model 2 |             | Model 3 |             | Model 4 |             |
|--------------------------------------------------|---------|-------------|---------|-------------|---------|-------------|---------|-------------|
|                                                  | OR      | (95% CI)    |
| Biomedical Service Use                           | 1.27*** | (1.13-1.42) | 1.18**  | (1.05-1.33) | 1.23*** | (1.09-1.38) | 1.17**  | (1.04-1.31) |
| EM Use Frequency (Ref= 1 to 3 times)             |         |             |         |             |         |             |         |             |
| 4 to 10 times                                    |         |             | 2.29*** | (2.00-2.64) |         |             | 2.30*** | (2.00-2.65) |
| 11 to 30 times                                   |         |             | 3.38*** | (2.90-3.96) |         |             | 3.45*** | (2.93-4.06) |
| 31 or more times                                 |         |             | 3.40*** | (2.71-4.27) |         |             | 3.53*** | (2.78-4.47) |
| Self-Rated Health Status (Ref= Very good)        |         |             |         |             |         |             |         |             |
| Very bad                                         |         |             |         |             | 0.88    | (0.54-1.43) | 0.58*   | (0.35-0.95) |
| Bad                                              |         |             |         |             | 1.32    | (0.93-1.88) | 0.92    | (0.64-1.32) |
| Fair                                             |         |             |         |             | 1.10    | (0.78-1.55) | 0.84    | (0.59-1.19) |
| Good                                             |         |             |         |             | 0.91    | (0.64-1.29) | 0.78    | (0.55-1.11) |
| Female                                           |         |             |         |             |         |             | 1.09    | (0.96-1.24) |
| Age (Ref= less than 20)                          |         |             |         |             |         |             |         |             |
| 20s or 30s                                       |         |             |         |             |         |             | 2.96*** | (1.98-4.44) |
| 40s                                              |         |             |         |             |         |             | 3.28*** | (2.13-5.05) |
| 50s                                              |         |             |         |             |         |             | 3.06*** | (2.00-4.70) |
| 60s                                              |         |             |         |             |         |             | 2.45*** | (1.58-3.79) |
| 70s                                              |         |             |         |             |         |             | 2.29*** | (1.46-3.58) |
| 80s or more                                      |         |             |         |             |         |             | 2.33**  | (1.37-3.97) |
| Marital Status (Ref= Single)                     |         |             |         |             |         |             |         |             |
| Married                                          |         |             |         |             |         |             | 1.12    | (0.91-1.39) |
| Widowed/Divorced/Separated                       |         |             |         |             |         |             | 1.13    | (0.83-1.52) |
| Others                                           |         |             |         |             |         |             | 1.08    | (0.50-2.34) |
| Education (Ref= No formal education)             |         |             |         |             |         |             |         |             |
| Elementary school                                |         |             |         |             |         |             | 1.05    | (0.80-1.38) |
| Middle school                                    |         |             |         |             |         |             | 0.92    | (0.68-1.25) |
| High school                                      |         |             |         |             |         |             | 0.97    | (0.72-1.31) |
| College or graduate school                       |         |             |         |             |         |             | 0.90    | (0.66-1.24) |
| Household Income (Ref= less than 1 million wons) |         |             |         |             |         |             |         |             |
| 1 to 1.9 million wons                            |         |             |         |             |         |             | 1.00    | (0.82-1.22) |
| 2 to 2.9 million wons                            |         |             |         |             |         |             | 0.95    | (0.77-1.17) |
| 3 to 3.9 million wons                            |         |             |         |             |         |             | 1.02    | (0.81-1.28) |
| 4 to 4.9 million wons                            |         |             |         |             |         |             | 1.05    | (0.82-1.35) |
| 5 million wons or more                           |         |             |         |             |         |             | 1.19    | (0.92-1.54) |
| Observations                                     |         |             | 3,861   |             | 3,861   |             | 3,861   |             |

Note: significant at 0.05 (\*), 0.01 (\*\*), 0.001 (\*\*\*).

Table A1. The Replication of Table 3 in Negative Binomial Regression Models

|                                                  | Model 1 |             | Model 2 |             | Model 3 |              | Model 4 |              |
|--------------------------------------------------|---------|-------------|---------|-------------|---------|--------------|---------|--------------|
|                                                  | coeff.  | (95% CI)    | coeff.  | (95% CI)    | coeff.  | (95% CI)     | coeff.  | (95% CI)     |
| Biomedical Service Use                           | 0.06**  | (0.02-0.10) | 0.04*   | (0.01-0.08) | 0.05**  | (0.02-0.09)  | 0.04*   | (0.01-0.08)  |
| EM Use Frequency (Ref= 1 to 3 times)             |         |             |         |             |         |              |         |              |
| 4 to 10 times                                    |         |             | 0.19*** | (0.14-0.23) |         |              | 0.18*** | (0.14-0.23)  |
| 11 to 30 times                                   |         |             | 0.27*** | (0.22-0.32) |         |              | 0.28*** | (0.22-0.33)  |
| 31 or more times                                 |         |             | 0.27*** | (0.20-0.35) |         |              | 0.28*** | (0.21-0.36)  |
| Self-Rated Health Status (Ref= Very good)        |         |             |         |             |         |              |         |              |
| Very bad                                         |         |             |         |             | -0.02   | (-0.18-0.14) | -0.11   | (-0.27-0.06) |
| Bad                                              |         |             |         |             | 0.06    | (-0.06-0.17) | -0.02   | (-0.14-0.10) |
| Fair                                             |         |             |         |             | 0.02    | (-0.09-0.13) | -0.04   | (-0.15-0.08) |
| Good                                             |         |             |         |             | -0.02   | (-0.13-0.10) | -0.05   | (-0.17-0.07) |
| Female                                           |         |             |         |             |         |              | 0.02    | (-0.02-0.06) |
| Age (Ref= less than 20)                          |         |             |         |             |         |              |         |              |
| 20s or 30s                                       |         |             |         |             |         |              | 0.24*** | (0.10-0.38)  |
| 40s                                              |         |             |         |             |         |              | 0.26*** | (0.11-0.41)  |
| 50s                                              |         |             |         |             |         |              | 0.25*** | (0.10-0.39)  |
| 60s                                              |         |             |         |             |         |              | 0.21**  | (0.05-0.36)  |
| 70s                                              |         |             |         |             |         |              | 0.18*   | (0.03-0.33)  |
| 80s or more                                      |         |             |         |             |         |              | 0.17    | (-0.01-0.35) |
| Marital Status (Ref= Single)                     |         |             |         |             |         |              |         |              |
| Married                                          |         |             |         |             |         |              | 0.03    | (-0.04-0.10) |
| Widowed/Divorced/Separated                       |         |             |         |             |         |              | 0.03    | (-0.06-0.13) |
| Others                                           |         |             |         |             |         |              | -0.02   | (-0.32-0.28) |
| Education (Ref= No formal education)             |         |             |         |             |         |              |         |              |
| Elementary school                                |         |             |         |             |         |              | 0.00    | (-0.09-0.09) |
| Middle school                                    |         |             |         |             |         |              | -0.02   | (-0.12-0.08) |
| High school                                      |         |             |         |             |         |              | -0.01   | (-0.11-0.09) |
| College or graduate school                       |         |             |         |             |         |              | -0.02   | (-0.12-0.09) |
| Household Income (Ref= less than 1 million wons) |         |             |         |             |         |              |         |              |
| 1 to 1.9 million wons                            |         |             |         |             |         |              | 0.01    | (-0.06-0.07) |
| 2 to 2.9 million wons                            |         |             |         |             |         |              | -0.00   | (-0.07-0.06) |
| 3 to 3.9 million wons                            |         |             |         |             |         |              | 0.00    | (-0.07-0.08) |
| 4 to 4.9 million wons                            |         |             |         |             |         |              | 0.02    | (-0.06-0.10) |
| 5 million wons or more                           |         |             |         |             |         |              | 0.04    | (-0.05-0.12) |
| Constant                                         | 1.04*** | (1.01-1.06) | 0.89*** | (0.85-0.93) | 1.02*** | (0.91-1.13)  | 0.67*** | (0.49-0.85)  |
| Observations                                     |         | 3,861       |         | 3,861       |         | 3,861        |         | 3,861        |

Note: significant at 0.05 (\*), 0.01 (\*\*), 0.001 (\*\*\*)

## STROBE Statement—checklist of items that should be included in reports of observational studies

|                           | Item No | Recommendation                                                                                                                                                                             | Page No |
|---------------------------|---------|--------------------------------------------------------------------------------------------------------------------------------------------------------------------------------------------|---------|
| <b>Title and abstract</b> | 1       | (a) Indicate the study's design with a commonly used term in the title or the abstract                                                                                                     | 1       |
|                           |         | (b) Provide in the abstract an informative and balanced summary of what was done and what was found                                                                                        | 1       |
| <b>Introduction</b>       |         |                                                                                                                                                                                            |         |
| Background/rationale      | 2       | Explain the scientific background and rationale for the investigation being reported                                                                                                       | 2 to 4  |
| Objectives                | 3       | State specific objectives, including any prespecified hypotheses                                                                                                                           | 4 to 5  |
| <b>Methods</b>            |         |                                                                                                                                                                                            |         |
| Study design              | 4       | Present key elements of study design early in the paper                                                                                                                                    | 5 to 6  |
| Setting                   | 5       | Describe the setting, locations, and relevant dates, including periods of recruitment, exposure, follow-up, and data collection                                                            | 5 to 6  |
| Participants              | 6       | (a) <i>Cohort study</i> —Give the eligibility criteria, and the sources and methods of selection of participants. Describe methods of follow-up                                            | n.a.    |
|                           |         | <i>Case-control study</i> —Give the eligibility criteria, and the sources and methods of case ascertainment and control selection. Give the rationale for the choice of cases and controls | n.a.    |
|                           |         | <i>Cross-sectional study</i> —Give the eligibility criteria, and the sources and methods of selection of participants                                                                      | 5 to 6  |
|                           |         | (b) <i>Cohort study</i> —For matched studies, give matching criteria and number of exposed and unexposed                                                                                   | n.a.    |
|                           |         | <i>Case-control study</i> —For matched studies, give matching criteria and the number of controls per case                                                                                 | n.a.    |
| Variables                 | 7       | Clearly define all outcomes, exposures, predictors, potential confounders, and effect modifiers. Give diagnostic criteria, if applicable                                                   | 6 to 7  |
| Data sources/measurement  | 8*      | For each variable of interest, give sources of data and details of methods of assessment (measurement). Describe comparability of assessment methods if there is more than one group       | 6 to 7  |
| Bias                      | 9       | Describe any efforts to address potential sources of bias                                                                                                                                  | 6       |
| Study size                | 10      | Explain how the study size was arrived at                                                                                                                                                  | 6       |
| Quantitative variables    | 11      | (a) Describe all statistical methods, including those used to control for confounding                                                                                                      | 7       |
|                           |         | (b) Describe any methods used to examine subgroups and interactions                                                                                                                        | n.a.    |
|                           |         | (c) Explain how missing data were addressed                                                                                                                                                | 6       |
|                           |         | (d) <i>Cohort study</i> —If applicable, explain how loss to follow-up was addressed                                                                                                        | n.a.    |
|                           |         | <i>Case-control study</i> —If applicable, explain how matching of cases and controls was addressed                                                                                         | n.a.    |
| Statistical methods       | 12      | <i>Cross-sectional study</i> —If applicable, describe analytical methods taking account of sampling strategy                                                                               | n.a.    |
|                           |         | (e) Describe any sensitivity analyses                                                                                                                                                      | 7       |

Continued on next page

**Results**

|                          |     |                                                                                                                                                                                                              |         |
|--------------------------|-----|--------------------------------------------------------------------------------------------------------------------------------------------------------------------------------------------------------------|---------|
| Participants             | 13* | (a) Report numbers of individuals at each stage of study—eg numbers potentially eligible, examined for eligibility, confirmed eligible, included in the study, completing follow-up, and analysed            | 6       |
|                          |     | (b) Give reasons for non-participation at each stage                                                                                                                                                         | 6       |
|                          |     | (c) Consider use of a flow diagram                                                                                                                                                                           | n.a.    |
| Descriptive data         | 14* | (a) Give characteristics of study participants (eg demographic, clinical, social) and information on exposures and potential confounders                                                                     | 7       |
|                          |     | (b) Indicate number of participants with missing data for each variable of interest                                                                                                                          | 6       |
|                          |     | (c) <i>Cohort study</i> —Summarise follow-up time (eg, average and total amount)                                                                                                                             | n.a.    |
| Outcome data             | 15* | <i>Cohort study</i> —Report numbers of outcome events or summary measures over time                                                                                                                          | n.a.    |
|                          |     | <i>Case-control study</i> —Report numbers in each exposure category, or summary measures of exposure                                                                                                         | n.a.    |
|                          |     | <i>Cross-sectional study</i> —Report numbers of outcome events or summary measures                                                                                                                           | 7       |
| Main results             | 16  | (a) Give unadjusted estimates and, if applicable, confounder-adjusted estimates and their precision (eg, 95% confidence interval). Make clear which confounders were adjusted for and why they were included | 8       |
|                          |     | (b) Report category boundaries when continuous variables were categorized                                                                                                                                    | 7       |
|                          |     | (c) If relevant, consider translating estimates of relative risk into absolute risk for a meaningful time period                                                                                             | n.a.    |
| Other analyses           | 17  | Report other analyses done—eg analyses of subgroups and interactions, and sensitivity analyses                                                                                                               | 10      |
| <b>Discussion</b>        |     |                                                                                                                                                                                                              |         |
| Key results              | 18  | Summarise key results with reference to study objectives                                                                                                                                                     | 9       |
| Limitations              | 19  | Discuss limitations of the study, taking into account sources of potential bias or imprecision. Discuss both direction and magnitude of any potential bias                                                   | 10      |
| Interpretation           | 20  | Give a cautious overall interpretation of results considering objectives, limitations, multiplicity of analyses, results from similar studies, and other relevant evidence                                   | 9 to 10 |
| Generalisability         | 21  | Discuss the generalisability (external validity) of the study results                                                                                                                                        | 10      |
| <b>Other information</b> |     |                                                                                                                                                                                                              |         |
| Funding                  | 22  | Give the source of funding and the role of the funders for the present study and, if applicable, for the original study on which the present article is based                                                | 11      |

\*Give information separately for cases and controls in case-control studies and, if applicable, for exposed and unexposed groups in cohort and cross-sectional studies.

**Note:** An Explanation and Elaboration article discusses each checklist item and gives methodological background and published examples of transparent reporting. The STROBE checklist is best used in conjunction with this article (freely available on the Web sites of PLoS Medicine at <http://www.plosmedicine.org/>, Annals of Internal Medicine at <http://www.annals.org/>, and Epidemiology at <http://www.epidem.com/>). Information on the STROBE Initiative is available at [www.strobe-statement.org](http://www.strobe-statement.org).



# BMJ Open

## The Association between the Use of Biomedical Services and the Holistic Use of Traditional East Asian Medicine: a National Survey of Outpatients in South Korea

|                                 |                                                                                                |
|---------------------------------|------------------------------------------------------------------------------------------------|
| Journal:                        | <i>BMJ Open</i>                                                                                |
| Manuscript ID                   | bmjopen-2017-018414.R1                                                                         |
| Article Type:                   | Research                                                                                       |
| Date Submitted by the Author:   | 30-Oct-2017                                                                                    |
| Complete List of Authors:       | Shim, Jae-Mahn; Korea University, Sociology<br>Lee, Yun-Suk; University of Seoul, Sociology    |
| <b>Primary Subject Heading</b>: | Complementary medicine                                                                         |
| Secondary Subject Heading:      | Sociology, Health services research, Public health                                             |
| Keywords:                       | holism, co-utilization, East Asian medicine, Korea, utilization behavior, institutionalization |
|                                 |                                                                                                |

SCHOLARONE™  
Manuscripts

Peer Review Only

1  
2  
3  
4 **The Association between the Use of Biomedical Services and the Holistic Use of**  
5 **Traditional East Asian Medicine: a National Survey of Outpatients in South Korea**  
6  
7

8  
9 **Authors**

10  
11 1. Jae-Mahn Shim, Ph.D. (\*Corresponding author)

12 Department of Sociology

13 Korea University

14 145 Anam-Ro, Seoungbuk-Gu

15 Seoul 02841, Korea

16 Email: jaemahn.shim@gmail.com

17 Phone: +82-2-3290-2088

18 Fax: +82-2-953-2142

19  
20  
21  
22  
23 2. Yun-Suk Lee, Ph.D.

24 Department of Sociology

25 University of Seoul

26 163 Seoulsiripdaero, Dongdaemungu

27 Seoul 130-742, Korea

28 Email: yslee@uos.ac.kr

29  
30  
31  
32 **Keywords:** holism; co-utilization; East Asian medicine; Korea; utilization behavior

33  
34  
35 **Word count:** 3,769

## Abstract

**Objectives:** The holistic use of a system of complementary and alternative medicine (CAM) is potentially linked to its treatment outcomes. This paper examines how the use of biomedicine is associated with the holistic use of CAM, focusing on traditional East Asian medicine (EM) that is uniquely integrated in the medical system in South Korea.

**Design/Settings:** A representative national sample of EM outpatients in South Korea.

**Participants:** 3,861 survey respondents.

**Methods:** By using the 2011 Korean National Survey of EM Patients, ordered logistic regression models specify the relationship between EM outpatients' use of biomedicine and their holistic use of EM modalities.

**Results:** Among EM outpatients who used at least one EM modality in the past three months, people who used two (33.3%) or three (29.4%) modalities together are the two greatest in number, followed by users of four (18.1%), five (7.2%), six (2.1%), and seven (0.6%) modalities. The odds for EM users to use EM holistically are 17% greater among EM users who used biomedicine as well, compared to EM users who did not use biomedicine.

**Conclusions:** Health care community should recognize that CAM use likely becomes holistic as people use biomedicine concomitantly, when the practice rights over a CAM system are comprehensively and exclusively entitled to a group of CAM professionals who are independent from practitioners of biomedicine.

### [Strengths and limitations of this study]

- It uses a national sample of EM users who visited EM facilities across South Korea.
- It specifies several multivariate ordered logistic regression models to support the findings.
- All the measures are based upon self-reports of survey participants.

## Introduction

The presence of complementary and alternative medicine (CAM) is substantial in contemporary health care systems around the world.<sup>1,2</sup> The health care community is concerned with the ways in which CAM is integrated in the mainstream biomedicine<sup>3,4</sup> and subsequent health care outcomes that CAM produces. Studies suggest that CAM services be provided holistically so that CAM users can utilize all the related treatment modalities within a whole system of CAM.<sup>5,6</sup> In the literature, the holistic use of a CAM system refers to the utilization behavior of CAM users who use two or more treatment modalities together that constitute the CAM system.<sup>7,8</sup> In the selective and fragmented use, on the contrary, people use only a certain modality of the CAM system and not the other modalities. It is argued that the holistic use can maximize the treatment effects of CAM, compared to the selective and fragmented use of only one modality out of multiple interrelated modalities in the whole system.<sup>8</sup>

This paper aims to investigate what generates this difference in the behavior of CAM users. Drawing on the literature of medical systems, the paper posits that the ways in which CAM is institutionalized in medical systems are consequential for the extent to which CAM users utilize various treatment modalities of a CAM system holistically. In accordance with previous studies,<sup>5-8</sup> the paper defines the holistic use of CAM as CAM users' utilization behavior in which two or more treatment modalities of a CAM system are used together rather than a single modality being used in isolation from the other modalities of the CAM system. When a user resorts to more modalities, its behavior is interpreted to be more holistic.

1  
2  
3  
4 The paper pursues this investigation by examining the case of a whole system of traditional  
5  
6 East Asian medicine (EM) that is composed of multiple treatment modalities, such as  
7  
8 acupuncture, moxibustion, cupping, herbal remedies, and acupressure. In particular, the paper  
9  
10 develops a specific hypothesis that elaborates the unique institutional condition of EM in  
11  
12 South Korea and relates it to the utilization behavior of EM users who may also use  
13  
14 biomedical services concomitantly that are readily available in the national health care system  
15  
16 of the country. The hypothesis focuses on how the use of biomedical services is associated  
17  
18 with the holistic use of EM in the Korean context.  
19  
20  
21  
22  
23

24 In Korea, the professional practice of EM is comprehensively and exclusively entitled to EM  
25  
26 doctors in separation from the professional practice of biomedicine by medical doctors.<sup>9-12</sup>  
27

28 Korea features distinctive systems of education and licensure for EM doctors who are legally  
29  
30 permitted to practice the whole range of modalities of EM, independent from medical doctors  
31  
32 of biomedicine. The EM doctors even hold the right to practice all the EM modalities in such  
33  
34 an exclusive way that doctors of biomedicine do not hold the right to practice any of the EM  
35  
36 modalities. Reciprocally, these EM doctors are not allowed to practice biomedicine. This  
37  
38 comprehensive sanction of all treatment modalities of EM within the medical system and, at  
39  
40 the same time, the exclusive entitlement of the practice rights of these modalities only to EM  
41  
42 doctors (and not biomedical doctors) likely project EM to medical service users as a system  
43  
44 of medical practices that is distinct and independent from biomedicine. EM is also viewed as  
45  
46 a whole medical system that is composed of a variety of interrelated treatment modalities that  
47  
48 are readily available for the needs of medical service users.  
49  
50  
51  
52  
53  
54  
55  
56  
57  
58  
59  
60

1  
2  
3  
4 In this institutional condition in Korea, EM users who co-utilize biomedical services as well  
5  
6 are likely those who search for diverse medical resources of different kinds that the national  
7  
8 medical system provides for them. These EM users, when compared to EM users who do not  
9  
10 use biomedical services and thus do not seek for diverse medical resources, are likely to seek  
11  
12 even more diverse modalities that are available within EM itself. Therefore, this paper  
13  
14 hypothesizes that the EM users who also use biomedical services are likely to use EM more  
15  
16 holistically.  
17  
18  
19  
20

21  
22 *Hypothesis: Among EM users in Korea where certified EM professionals hold the*  
23  
24 *comprehensive and exclusive practice rights over EM, medical service users' use of*  
25  
26 *biomedical services is positively associated with their likelihood of using EM holistically.*  
27  
28  
29

### 30 **Methods**

31  
32  
33  
34  
35 Data come from the 2011 Korean National Survey of EM Patients (NSEMP) that was  
36  
37 administered to a nationally representative sample of patients who visited (i.e. outpatients) or  
38  
39 were hospitalized (i.e. inpatients) in an EM facility as of September 2011. This survey used  
40  
41 the national sampling frame of 12,250 EM facilities that were registered in the national health  
42  
43 insurance system. This sampling frame was duly regarded as the national population of EM  
44  
45 facilities in Korea, since all medical service providers should be registered in the national  
46  
47 insurance system for reimbursement from the national government in the universal Korean  
48  
49 health care system. The survey then drew a stratified systematic sample of 471 EM facilities  
50  
51 (4% of the sampling frame). At each selected facility, the outpatient questionnaire of the  
52  
53 survey was administered to a random sample of 9 outpatients drawn from people in the  
54  
55  
56  
57  
58  
59  
60

1  
2  
3  
4 waiting area. When the facility was equipped with hospital beds, an additional random  
5  
6 sample of 8 inpatients was drawn from the list of inpatients and these inpatients participated  
7  
8 in the inpatient questionnaire. As a result, 3,926 outpatients and 1,581 inpatients participated  
9  
10 in the survey.  
11

12  
13  
14  
15 This paper analyzes only the responses from the outpatient EM users, since only the  
16  
17 outpatient questionnaire investigated the uses of EM in each of the seven different EM  
18  
19 modalities in detail; the inpatient questionnaire investigated whether a respondent ever used  
20  
21 any of the EM modalities without differentiating which modality was used. These inpatient  
22  
23 responses give no information of which and how many EM modalities were used and, thus,  
24  
25 how holistic the EM use was. As a result, the following analysis includes responses from the  
26  
27 final sample of 3,861 outpatient EM users. Its difference from the total outpatient participants  
28  
29 (65 = 3,926 – 3,861) is due to a further exclusion of 65 inpatient respondents that are missing  
30  
31 values in one or more of the variables that are included in the following analysis. This study,  
32  
33 which uses publically available survey data, is granted an exemption from requiring ethics  
34  
35 approval by the Institutional Review Board of Korea University.  
36  
37  
38

39  
40  
41  
42 The dependent variable, *the holistic use of EM*, is an ordinal variable that measures the  
43  
44 number of different EM modalities that were used together by a respondent in the past three  
45  
46 months. It is a composite measure that summarizes responses to seven distinct questions.  
47  
48 Each of the seven questions asked whether a respondent used one of the seven EM modalities  
49  
50 respectively (“have you used [a specific EM modality] for medical problems in the past three  
51  
52 months?”), such as 1) herbal extracts, 2) herbal pills/powders, 3) acupuncture, 4) moxibustion,  
53  
54 5) cupping, 6) chuna, and 7) manual treatments. The response to each question is coded 1 if  
55  
56  
57  
58  
59  
60

yes (0 if not). Thus, the values of the dependent variable range from 1 to 7. The focal independent variable is *the use of biomedical services* which measures whether a respondent visited a biomedical clinic or hospital where biomedical doctors provide medical services for the medical conditions for which the respondent used EM modalities. It is coded 1 if a respondent visited a biomedical clinic or hospital (0 if not).

Table 1. Descriptive Statistics<sup>1)</sup> of Variables Used (N=3,861)

| Variable                       | N     | %    | Variable                   | N     | %    |
|--------------------------------|-------|------|----------------------------|-------|------|
| The Holistic Use of EM         |       |      | Age                        |       |      |
| 1                              | 363   | 9.4  | less than 20               | 143   | 3.7  |
| 2                              | 1,284 | 33.3 | 20s or 30s                 | 894   | 23.2 |
| 3                              | 1,135 | 29.4 | 40s                        | 762   | 19.7 |
| 4                              | 699   | 18.1 | 50s                        | 833   | 21.6 |
| 5                              | 276   | 7.2  | 60s                        | 575   | 14.9 |
| 6                              | 82    | 2.1  | 70s                        | 522   | 13.5 |
| 7                              | 22    | 0.6  | 80s or more                | 132   | 3.4  |
| The Use of Biomedical Services |       |      | Marital Status             |       |      |
| Yes                            | 1,641 | 42.5 | Single                     | 613   | 15.9 |
| No                             | 2,220 | 57.5 | Married                    | 2,783 | 72.1 |
| EM Use Frequency <sup>2)</sup> |       |      | Widowed/Divorced/Separated |       |      |
| 1 to 3 times                   | 1,389 | 36.0 | Others                     | 440   | 11.4 |
| 4 to 10 times                  | 1,289 | 33.4 | Education                  |       |      |
| 11 to 30 times                 | 885   | 22.9 | No formal education        | 279   | 7.2  |
| 30 times or more               | 298   | 7.7  | Elementary school          | 557   | 14.4 |
| Self-Rated Health Status       |       |      | Middle school              | 467   | 12.1 |
| Very bad                       | 103   | 2.7  | High school                | 1,215 | 31.5 |
| Bad                            | 1,010 | 26.2 | College or graduate school | 1,343 | 34.8 |
| Fair                           | 1,651 | 42.8 | Household Income           |       |      |
| Good                           | 983   | 25.5 | less than 1 million wons   | 733   | 19.0 |
| Very good                      | 114   | 3.0  | 1 to 1.9 million wons      | 789   | 20.4 |
| Gender                         |       |      | 2 to 2.9 million wons      | 831   | 21.5 |
| Male                           | 1,161 | 30.1 | 3 to 3.9 million wons      | 615   | 15.9 |
| Female                         | 2,700 | 69.9 | 4 to 4.9 million wons      | 446   | 11.6 |
|                                |       |      | 5 million wons or more     | 447   | 11.6 |

Note: <sup>1)</sup> The socio-demographic characteristics of EM users show that EM is being used very widely across different social groups in age, education, and income. <sup>2)</sup> This refers to how many times a respondent has used EM services in the past three months. It is certain that, when a respondent uses EM less often, the respondent is less likely to use different treatment modalities of EM. However, a respondent who uses EM very often does not necessarily utilize different treatment modalities (e.g. a respondent who uses only acupuncture many times).

A set of potential covariates, which may intervene in the relationship between holistic EM use and the use of biomedical services, are incorporated in the analysis as control variables. These control variables are the frequency of EM use, self-rated health status, gender, age, marital status, the highest level of education, and monthly household income (Table 1 for



1  
2  
3  
4 descriptive statistics). This paper uses ordered logistic regression models to test the  
5  
6 hypothesis about the relationship between holistic EM use and the use of biomedical services,  
7  
8 since it interprets different values in the dependent variable as ordered categories that refer to  
9  
10 the extent of holistic EM use. Results from negative binomial regression models, which treat  
11  
12 the dependent variable as a count measure, agree with the results reported here. For  
13  
14 comparison, results from negative binomial regression models are reported in Table A1 in the  
15  
16 Appendix.  
17  
18  
19  
20

## 21 **Results**

22  
23  
24  
25  
26 Among all current outpatient EM users who used at least one EM modality in the past three  
27  
28 months, EM users who used two or three modalities are the two greatest in number, followed  
29  
30 by those who used four, five, six, and seven modalities. The proportion of EM users who  
31  
32 used only one modality is only 9.4%. It turns out that more than 90% of current EM  
33  
34 outpatients in Korea used multiple EM modalities together when they ever resorted to EM.  
35  
36  
37  
38

39  
40 Close to a half of these EM users (42.5%) also used biomedical services by visiting a  
41  
42 biomedical clinic or hospital. In addition, the bivariate tabulation on the relationship between  
43  
44 the extent of holistic EM use and the use of biomedical services shows that there is a positive  
45  
46 relationship between the two; EM users who utilized various EM modalities more holistically  
47  
48 were more likely to use biomedical services as well (Table 2). Put differently, EM users who  
49  
50 also used biomedical services were more likely to utilize EM modalities holistically than EM  
51  
52 users who did not use biomedical services.  
53  
54  
55  
56  
57  
58  
59  
60

Table 2. The Bivariate Association between the Use of Biomedical Services and the Holistic Use of Traditional East Asian Medicine (EM)

|                           | The Use of Biomedical Services |             |               |
|---------------------------|--------------------------------|-------------|---------------|
|                           | No                             | Yes         | Total         |
| The Holistic Use of EM    | 1 227 (62.5)                   | 136 (37.5)  | 363 (100.0)   |
| (# of EM Modalities Used) | 2 766 (59.7)                   | 518 (40.3)  | 1284 (100.0)  |
|                           | 3 654 (57.6)                   | 481 (42.4)  | 1135 (100.0)  |
|                           | 4 389 (55.6)                   | 310 (44.4)  | 699 (100.0)   |
|                           | 5 138 (50.0)                   | 138 (50.0)  | 276 (100.0)   |
|                           | 6 39 (47.6)                    | 43 (52.4)   | 82 (100.0)    |
|                           | 7 7 (31.8)                     | 15 (68.2)   | 22 (100.0)    |
| Total                     | 2,220 (57.5)                   | 1641 (42.5) | 3,861 (100.0) |

Note: Percentages in parentheses. Pearson's  $\chi^2$  (6) = 22.8001; p-value = 0.001.

Table 3. Ordered Logistic Regression Models of Holistic EM Use upon the Use of Biomedical Services and Other Covariates

|                                                  | Model 1 |             | Model 2 |             | Model 3 |             | Model 4 |             |
|--------------------------------------------------|---------|-------------|---------|-------------|---------|-------------|---------|-------------|
|                                                  | OR      | (95% CI)    |
| Biomedical Service Use                           | 1.27*** | (1.13-1.42) | 1.18**  | (1.05-1.33) | 1.23*** | (1.09-1.38) | 1.17**  | (1.04-1.31) |
| EM Use Frequency (Ref= 1 to 3 times)             |         |             |         |             |         |             |         |             |
| 4 to 10 times                                    |         |             | 2.29*** | (2.00-2.64) |         |             | 2.30*** | (2.00-2.65) |
| 11 to 30 times                                   |         |             | 3.38*** | (2.90-3.96) |         |             | 3.45*** | (2.93-4.06) |
| 31 or more times                                 |         |             | 3.40*** | (2.71-4.27) |         |             | 3.53*** | (2.78-4.47) |
| Self-Rated Health Status (Ref= Very good)        |         |             |         |             |         |             |         |             |
| Very bad                                         |         |             |         |             | 0.88    | (0.54-1.43) | 0.58*   | (0.35-0.95) |
| Bad                                              |         |             |         |             | 1.32    | (0.93-1.88) | 0.92    | (0.64-1.32) |
| Fair                                             |         |             |         |             | 1.10    | (0.78-1.55) | 0.84    | (0.59-1.19) |
| Good                                             |         |             |         |             | 0.91    | (0.64-1.29) | 0.78    | (0.55-1.11) |
| Female                                           |         |             |         |             |         |             | 1.09    | (0.96-1.24) |
| Age (Ref= less than 20)                          |         |             |         |             |         |             |         |             |
| 20s or 30s                                       |         |             |         |             |         |             | 2.96*** | (1.98-4.44) |
| 40s                                              |         |             |         |             |         |             | 3.28*** | (2.13-5.05) |
| 50s                                              |         |             |         |             |         |             | 3.06*** | (2.00-4.70) |
| 60s                                              |         |             |         |             |         |             | 2.45*** | (1.58-3.79) |
| 70s                                              |         |             |         |             |         |             | 2.29*** | (1.46-3.58) |
| 80s or more                                      |         |             |         |             |         |             | 2.33**  | (1.37-3.97) |
| Marital Status (Ref= Single)                     |         |             |         |             |         |             |         |             |
| Married                                          |         |             |         |             |         |             | 1.12    | (0.91-1.39) |
| Widowed/Divorced/Separated                       |         |             |         |             |         |             | 1.13    | (0.83-1.52) |
| Others                                           |         |             |         |             |         |             | 1.08    | (0.50-2.34) |
| Education (Ref= No formal education)             |         |             |         |             |         |             |         |             |
| Elementary school                                |         |             |         |             |         |             | 1.05    | (0.80-1.38) |
| Middle school                                    |         |             |         |             |         |             | 0.92    | (0.68-1.25) |
| High school                                      |         |             |         |             |         |             | 0.97    | (0.72-1.31) |
| College or graduate school                       |         |             |         |             |         |             | 0.90    | (0.66-1.24) |
| Household Income (Ref= less than 1 million wons) |         |             |         |             |         |             |         |             |
| 1 to 1.9 million wons                            |         |             |         |             |         |             | 1.00    | (0.82-1.22) |
| 2 to 2.9 million wons                            |         |             |         |             |         |             | 0.95    | (0.77-1.17) |
| 3 to 3.9 million wons                            |         |             |         |             |         |             | 1.02    | (0.81-1.28) |
| 4 to 4.9 million wons                            |         |             |         |             |         |             | 1.05    | (0.82-1.35) |
| 5 million wons or more                           |         |             |         |             |         |             | 1.19    | (0.92-1.54) |
| Observations                                     |         |             | 3,861   |             | 3,861   |             | 3,861   |             |
|                                                  |         |             |         |             |         |             |         | 3,861       |

Note: significant at 0.05 (\*), 0.01 (\*\*), 0.001 (\*\*\*).

1  
2  
3  
4 Model 1 in Table 3 puts this bivariate association in odds ratio and finds it to be statistically  
5 significant. The odds for EM users who also used biomedical services to utilize EM  
6  
7  
8 holistically are greater than those for EM users who did not use biomedical services  
9  
10 (OR=1.27; 95% CI=1.13–1.42). The two subsequent models show that this association  
11  
12 remains the same when respondents' frequency of EM use is controlled (Model 2) or when  
13  
14 respondents' health status is controlled (Model 3). The final Model 4 incorporates these two  
15  
16 confounders together and other possible confounders as control variables; the positive  
17  
18 association between holistic EM use and the use of biomedical services still persists. In this  
19  
20 final model, the odds for EM users who also used biomedicine to use EM holistically are  
21  
22 17% greater than those for EM users who did not use biomedicine (OR=1.17; 95% CI=1.04–  
23  
24 1.31). These results support the hypothesis unambiguously.  
25  
26  
27  
28  
29

### 30 **Discussion**

31  
32  
33  
34  
35 This paper found that people who used biomedicine were more likely to use EM holistically  
36  
37 in South Korea. Among EM outpatients who used at least one EM modality in the past three  
38  
39 months, people who used two or three modalities together are the two greatest in number,  
40  
41 followed by users of four, five, six, and seven modalities. The odds for EM users to use EM  
42  
43 holistically are greater among EM users who used biomedicine as well, compared to EM  
44  
45 users who did not use biomedicine. It is a limitation of this study that it used measures based  
46  
47 on self-reports of survey participants. However, it is worth noting that the paper used a  
48  
49 national sample of EM users who visited EM facilities across South Korea and specified  
50  
51 multivariate regression models to show the robustness of these findings.  
52  
53  
54  
55  
56  
57  
58  
59  
60

1  
2  
3  
4 To our knowledge, this is the first study in the global medical community that examines how  
5  
6 the use of biomedical services is associated with the extent to which the users of CAM utilize  
7  
8 various modalities of a CAM system holistically. It is surprising that this line of inquiry has  
9  
10 been neglected in the literature, in spite of a potential link between the holistic-vs-selective  
11  
12 utilization of a CAM system and its health care outcomes. Furthermore, it is very probable  
13  
14 that CAM users shape their specific ways of using CAM in relation with biomedical services  
15  
16 that are available to them. In this sense, this paper contributes to developing a much-needed  
17  
18 analytical perspective that elaborates CAM utilization behavior beyond existent studies of the  
19  
20 simple utilization rate and the popularity of CAM.<sup>13-19</sup>  
21  
22  
23  
24  
25

26 As such, this perspective has grown out of a group of studies that investigate the  
27  
28 complementary-versus-substitutive relationship between CAM use and biomedicine use.<sup>9,20-23</sup>  
29  
30 Whereas these existing studies have investigated whether the utilization of fragmented CAM  
31  
32 modalities increases or decreases the utilization of biomedical services by comparing the  
33  
34 behavior of CAM users to the behavior of non-users, this paper originally focuses on CAM  
35  
36 users only and investigates how their CAM utilization behavior is shaped by their use (vs.  
37  
38 non-use) of biomedical services. In this sense, this paper provides CAM-centered evidence to  
39  
40 the complementarity-versus-substitution debate; its finding suggests that CAM use can be  
41  
42 complementary to biomedicine to the extent that users rely on a variety of treatment  
43  
44 modalities within a CAM system even when they use biomedical services (i.e. the holistic co-  
45  
46 utilization of CAM).  
47  
48  
49  
50  
51  
52

53 The findings in this paper suggest that the knowledge of how CAM is institutionalized in a  
54  
55 medical system can generate reasonable predictions about how CAM users behave. It is  
56  
57  
58  
59  
60

1  
2  
3  
4 known that the various modalities of EM are disconnected from one another in the Japanese  
5  
6 medical system so that only herbal remedies are selectively incorporated into the practices of  
7  
8 biomedical doctors;<sup>24-28</sup> acupuncture and acupressure are each relegated as pseudo-medicine  
9  
10 to medical technicians, such as acupuncturists and massage therapists who are permitted to  
11  
12 practice only acupuncture and massage therapies. These technicians are not allowed to  
13  
14 practice herbal remedies or other EM modalities. Similar observations are made that the  
15  
16 otherwise rich practices of acupuncture are truncated and simplified in the dominant  
17  
18 biomedical health care systems in the U.S.<sup>29-31</sup> and the U.K.<sup>32</sup> In the contemporary French  
19  
20 biomedical system, a variety of CAM systems are reported to become “balkanized” and their  
21  
22 constituent treatment modalities are torn apart from one another in practice.<sup>33</sup> In these  
23  
24 institutional contexts, this paper suggest, the intersection of a CAM system with biomedicine  
25  
26 can result in the fragmented and partial use of the CAM system as people use biomedical  
27  
28 services concomitantly.  
29  
30  
31  
32  
33  
34

### 35 **Conclusions**

36  
37  
38  
39 Health care community should recognize that CAM use likely becomes holistic as people use  
40  
41 biomedicine concomitantly, when the practice rights over a CAM system are  
42  
43 comprehensively and exclusively entitled to a group of CAM professionals who are  
44  
45 independent from practitioners of biomedicine. This conclusion is based upon the experiences  
46  
47 of EM users in Korea. It will take more research to generalize this finding against other  
48  
49 institutional contexts and, at the same time, to discern any cross-national differences. A  
50  
51 comparative study between the East Asian countries, such as China, Korea, and Japan where  
52  
53 EM originated and is institutionalized differently, will shed more light.  
54  
55  
56  
57  
58  
59  
60

1  
2  
3  
4  
5  
6 The authors recommend that the CAM-centered perspective, asking how CAM use is  
7  
8 reconstructed by biomedicine use, is especially relevant to studying CAM utilization behavior  
9  
10 in societies where a relatively coherent system of CAM has existed for quite some time (e.g.  
11  
12 traditional Indian medicine in the U.S., traditional African medicine in Africa, Ayurveda and  
13  
14 Indian medical traditions in India, etc.). The international medical community will gain a lot  
15  
16 from these future studies. It will gain even more from the studies when the link between the  
17  
18 holistic-versus-selective use of CAM and its varying health care outcomes is examined  
19  
20 further.  
21  
22  
23  
24  
25

## 26 **Appendix**

27  
28  
29  
30 [Table A1]  
31  
32  
33  
34

## 35 **Contributorship Statement**

36  
37 JMS conceived the study, analyzed the data, and wrote the manuscript. YSL helped conceive  
38  
39 the study, modify the data analysis, and revise the manuscript.  
40  
41  
42  
43

## 44 **Acknowledgements**

45  
46 This work was supported by the Ministry of Education of the Republic of Korea and the  
47  
48 National Research Foundation of Korea (NRF-2015S1A5A8017517). The views in this paper  
49  
50 are the authors' and should not be interpreted as those of the supporter. The authors thank  
51  
52 Keith Woogerd for his copyediting the manuscript.  
53  
54  
55  
56  
57  
58  
59  
60

### Competing Interests

The authors declared no potential conflicts of interest with respect to the research, authorship, and/or publication of this article.

### Funding

The first and corresponding author received financial support from the Ministry of Education of the Republic of Korea and the National Research Foundation of Korea (NRF-2015S1A5A8017517) for data analysis and manuscript writing.

### Data Sharing Statement

The data are available from the corresponding author upon request.

### References

1. WHO. *WHO Traditional Medicine Strategy 2014-2023*. World Health Organization;2013.
2. Bodeker G, Ong C-K, Grundy C, Burford G, Shein K. *WHO Global Atlas of Traditional, Complementary and Alternative Medicine*. Kobe, Japan: WHO Centre for Health Development; 2005.
3. Xu J, Yang Y. Traditional Chinese Medicine in the Chinese Health Care System. *Health Policy*. 2009;90(2-3):133-139.
4. Kaboru BB, Falkenberg T, Ndulo J, Muchimba M, Solo K, Faxelid E. Communities' Views on Prerequisites for Collaboration between Modern and Traditional Health

- 1  
2  
3  
4 Sectors in Relation to STI/HIV/AIDS Care in Zambia. *Health Policy*. 2006;78(2–  
5 3):330-339.  
6  
7  
8  
9 5. MacPherson H, Nahin R, Paterson C, Cassidy CM, Lewith GT, Hammerschlag R.  
10 Developments in Acupuncture Research: Big-picture Perspectives from the Leading  
11 Edge. *J Altern Complement Med*. 2008;14(7):883-887.  
12  
13 6. Ritenbaugh C, Verhoef M, Fleishman S. Whole Systems Research: A Discipline for  
14 Studying Complementary and Alternative Medicine. *Altern Ther Health Med*.  
15 2003;9:32-36.  
16  
17 7. Shim J-M, Kim J. Cross-national Differences in the Holistic Use of Traditional East  
18 Asian Medicine in East Asia. *Health Promot Int*. 2016. Doi: 10.1093/heapro/daw089.  
19  
20 8. Cao Y, Zhan H, Pang J, et al. Individually Integrated Traditional Chinese Medicine  
21 Approach in the Management of Knee Osteoarthritis: Study Protocol for a  
22 Randomized Controlled Trial. *Trials*. 2011;12:160.  
23  
24 9. Shim J-M. The Relationship Between the Use of Complementary and Alternative  
25 Medicine and the Use of Biomedical Services: Evidence From East Asian Medical  
26 Systems. *Asia Pac J Public Health*. 2016;28(1):51-60.  
27  
28 10. Holliday I. Traditional Medicines in Modern Societies: An Exploration of  
29 Integrationist Options through East Asian Experience. *J Med Philos*. 2003;28(3):373-  
30 389.  
31  
32 11. Yoon K-J, Kim D-S. *Ui-Hanui Kongsangbalchunul Wihan Tonghapchok*  
33 *Chopkeunbangsik Mosaek (Ways of Integrating Oriental Medicine and Western*  
34 *Medicine)*. Korea Institute of Health and Social Affairs;2013.  
35  
36 12. Shin D. How Four Different Political Systems Have Shaped the Modernization of  
37 Traditional Korean Medicine between 1900 and 1960. *Hist Sci*. 2008;17(3):225-241.  
38  
39  
40  
41  
42  
43  
44  
45  
46  
47  
48  
49  
50  
51  
52  
53  
54  
55  
56  
57  
58  
59  
60



- 1  
2  
3  
4 13. Frass M, Strassl RP, Friehs H, Müllner M, Kundi M, Kaye AD. Use and Acceptance  
5  
6 of Complementary and Alternative Medicine Among the General Population and  
7  
8 Medical Personnel: A Systematic Review. *Ochsner J.* 2012;12(1):45-56.  
9
- 10  
11 14. Harris PE, Cooper KL, Relton C, Thomas KJ. Prevalence of Complementary and  
12  
13 Alternative Medicine (CAM) Use by the General Population: a Systematic Review  
14  
15 and Update. *Int J Clin Pract.* 2012;66(10):924-939.  
16
- 17  
18 15. Wai WT, Lan WS, Donnan SPB. Prevalence and Determinants of the Use of  
19  
20 Traditional Chinese Medicine in Hong Kong. *Asia Pac J Public Health.*  
21  
22 1995;8(3):167-170.  
23
- 24  
25 16. Chen FP, Chen TJ, Kung YY, et al. Use Frequency of Traditional Chinese Medicine  
26  
27 in Taiwan. *BMC Health Serv Res.* 2007;7:26.  
28
- 29  
30 17. Hori S, Mihaylov I, Vasconcelos J, McCoubrie M. Patterns of Complementary and  
31  
32 Alternative Medicine Use amongst Outpatients in Tokyo, Japan. *BMC Complement*  
33  
34 *Altern Med.* 2008;8(1):14.  
35
- 36  
37 18. Hong CD. Complementary and Alternative Medicine in Korea: Current Status and  
38  
39 Future Prospects. *J Altern Complement Med.* 2001;7(6):33-40.  
40
- 41  
42 19. Jin L. From Mainstream to Marginal? Trends in the Use of Chinese Medicine in  
43  
44 China from 1991 to 2004. *Soc Sci Med.* 2010;71(6):1063-1067.  
45
- 46  
47 20. Druss BG, Rosenheck RA. Association Between Use of Unconventional Therapies  
48  
49 and Conventional Medical Services. *JAMA.* 1999;282(7):651-656.  
50
- 51  
52 21. van Gameren E. Health Insurance and Use of Alternative Medicine in Mexico. *Health*  
53  
54 *Policy.* 2010;98(1):50-57.  
55  
56  
57  
58  
59  
60

- 1  
2  
3  
4 22. Ayers SL, Kronenfeld JJ. Delays in Seeking Conventional Medical Care and  
5 Complementary and Alternative Medicine Utilization. *Health Serv Res.*  
6 2012;47(5):2081-2096.  
7  
8  
9  
10  
11 23. Pagán JA, Pauly MV. Access to Conventional Medical Care and the Use of  
12 Complementary and Alternative Medicine. *Health Aff.* 2005;24(1):255-262.  
13  
14  
15 24. Lock M. *East Asian Medicine in Urban Japan: Varieties of Medical Experience.* Vol  
16 no. 4. Berkeley: University of California Press; 1980.  
17  
18  
19 25. Lock M. The Organization and Practice of East Asian Medicine in Japan: Continuity  
20 and Change. *Soc Sci Med.* 1980;14B(4):245-253.  
21  
22  
23  
24 26. Katayama K, Yoshino T, Munakata K, et al. Prescription of Kampo Drugs in the  
25 Japanese Health Care Insurance Program. *Evid Based Complement Alternat Med.*  
26 2013;2013:576973.  
27  
28  
29  
30  
31 27. Kobayashi A, Uefuji M, Yasumo W. History and Progress of Japanese Acupuncture.  
32 *Evid Based Complement Alternat Med.* 2010;7(3):359-365.  
33  
34  
35 28. Tsutani K. The Evaluation of Herbal Medicines: an East Asian Perspective. In:  
36 Lewith GT, Aldridge D, eds. *Clinical Research Methodology for Complementary*  
37 *Therapies.* London: Hodder & Stoughton; 1993:365-393.  
38  
39  
40  
41 29. Barnes LL. The Acupuncture Wars: the Professionalizing of American Acupuncture.  
42 *Med Anthropol.* 2003;22(3):261-301.  
43  
44  
45  
46 30. Wolpe PR. The Maintenance of Professional Authority: Acupuncture and the  
47 American Physician. *Soc Probl.* 1985;32(5):409-424.  
48  
49  
50  
51 31. Braverman C, Baker C, Harris R. Acupuncture and Oriental Medicine (AOM) in the  
52 United States. *Am Acupuncturist.* 2009;47:22-26.  
53  
54  
55  
56  
57  
58  
59  
60

- 1  
2  
3  
4 32. Givati A, Hatton K. Traditional acupuncturists and higher education in Britain: The  
5  
6 dual, paradoxical impact of biomedical alignment on the holistic view. *Soc Sci Med*.  
7  
8 2015;131:173-180.  
9  
10 33. Ramsey M. Alternative Medicine in Modern France. *Medical Hist*. 1999;43(3):286.  
11  
12  
13  
14  
15  
16  
17  
18  
19  
20  
21  
22  
23  
24  
25  
26  
27  
28  
29  
30  
31  
32  
33  
34  
35  
36  
37  
38  
39  
40  
41  
42  
43  
44  
45  
46  
47  
48  
49  
50  
51  
52  
53  
54  
55  
56  
57  
58  
59  
60

For peer review only

Table A1. The Replication of Table 3 in Negative Binomial Regression Models

|                                                   | Model 1 |             | Model 2 |             | Model 3 |              | Model 4 |              |
|---------------------------------------------------|---------|-------------|---------|-------------|---------|--------------|---------|--------------|
|                                                   | coeff.  | (95% CI)    | coeff.  | (95% CI)    | coeff.  | (95% CI)     | coeff.  | (95% CI)     |
| Biomedical Service Use                            | 0.06**  | (0.02-0.10) | 0.04*   | (0.01-0.08) | 0.05**  | (0.02-0.09)  | 0.04*   | (0.01-0.08)  |
| EM Use Frequency (Ref = 1 to 3 times)             |         |             |         |             |         |              |         |              |
| 4 to 10 times                                     |         |             | 0.19*** | (0.14-0.23) |         |              | 0.18*** | (0.14-0.23)  |
| 11 to 30 times                                    |         |             | 0.27*** | (0.22-0.32) |         |              | 0.28*** | (0.22-0.33)  |
| 31 or more times                                  |         |             | 0.27*** | (0.20-0.35) |         |              | 0.28*** | (0.21-0.36)  |
| Self-Rated Health Status (Ref = Very good)        |         |             |         |             |         |              |         |              |
| Very bad                                          |         |             |         |             | -0.02   | (-0.18-0.14) | -0.11   | (-0.27-0.06) |
| Bad                                               |         |             |         |             | 0.06    | (-0.06-0.17) | -0.02   | (-0.14-0.10) |
| Fair                                              |         |             |         |             | 0.02    | (-0.09-0.13) | -0.04   | (-0.15-0.08) |
| Good                                              |         |             |         |             | -0.02   | (-0.13-0.10) | -0.05   | (-0.17-0.07) |
| Female                                            |         |             |         |             |         |              | 0.02    | (-0.02-0.06) |
| Age (Ref = less than 20)                          |         |             |         |             |         |              |         |              |
| 20s or 30s                                        |         |             |         |             |         |              | 0.24*** | (0.10-0.38)  |
| 40s                                               |         |             |         |             |         |              | 0.26*** | (0.11-0.41)  |
| 50s                                               |         |             |         |             |         |              | 0.25*** | (0.10-0.39)  |
| 60s                                               |         |             |         |             |         |              | 0.21**  | (0.05-0.36)  |
| 70s                                               |         |             |         |             |         |              | 0.18*   | (0.03-0.33)  |
| 80s or more                                       |         |             |         |             |         |              | 0.17    | (-0.01-0.35) |
| Marital Status (Ref = Single)                     |         |             |         |             |         |              |         |              |
| Married                                           |         |             |         |             |         |              | 0.03    | (-0.04-0.10) |
| Widowed/Divorced/Separated                        |         |             |         |             |         |              | 0.03    | (-0.06-0.13) |
| Others                                            |         |             |         |             |         |              | -0.02   | (-0.32-0.28) |
| Education (Ref = No formal education)             |         |             |         |             |         |              |         |              |
| Elementary school                                 |         |             |         |             |         |              | 0.00    | (-0.09-0.09) |
| Middle school                                     |         |             |         |             |         |              | -0.02   | (-0.12-0.08) |
| High school                                       |         |             |         |             |         |              | -0.01   | (-0.11-0.09) |
| College or graduate school                        |         |             |         |             |         |              | -0.02   | (-0.12-0.09) |
| Household Income (Ref = less than 1 million wons) |         |             |         |             |         |              |         |              |
| 1 to 1.9 million wons                             |         |             |         |             |         |              | 0.01    | (-0.06-0.07) |
| 2 to 2.9 million wons                             |         |             |         |             |         |              | -0.00   | (-0.07-0.06) |
| 3 to 3.9 million wons                             |         |             |         |             |         |              | 0.00    | (-0.07-0.08) |
| 4 to 4.9 million wons                             |         |             |         |             |         |              | 0.02    | (-0.06-0.10) |
| 5 million wons or more                            |         |             |         |             |         |              | 0.04    | (-0.05-0.12) |
| Constant                                          | 1.04*** | (1.01-1.06) | 0.89*** | (0.85-0.93) | 1.02*** | (0.91-1.13)  | 0.67*** | (0.49-0.85)  |
| Observations                                      |         | 3,861       |         | 3,861       |         | 3,861        |         | 3,861        |

Note: significant at 0.05 (\*), 0.01 (\*\*), 0.001 (\*\*\*).

## STROBE Statement—checklist of items that should be included in reports of observational studies

|                           | Item No | Recommendation                                                                                                                                                                             | Page No |
|---------------------------|---------|--------------------------------------------------------------------------------------------------------------------------------------------------------------------------------------------|---------|
| <b>Title and abstract</b> | 1       | (a) Indicate the study's design with a commonly used term in the title or the abstract                                                                                                     | 1       |
|                           |         | (b) Provide in the abstract an informative and balanced summary of what was done and what was found                                                                                        | 1       |
| <b>Introduction</b>       |         |                                                                                                                                                                                            |         |
| Background/rationale      | 2       | Explain the scientific background and rationale for the investigation being reported                                                                                                       | 2 to 3  |
| Objectives                | 3       | State specific objectives, including any prespecified hypotheses                                                                                                                           | 3 to 4  |
| <b>Methods</b>            |         |                                                                                                                                                                                            |         |
| Study design              | 4       | Present key elements of study design early in the paper                                                                                                                                    | 4 to 6  |
| Setting                   | 5       | Describe the setting, locations, and relevant dates, including periods of recruitment, exposure, follow-up, and data collection                                                            | 4 to 6  |
| Participants              | 6       | (a) <i>Cohort study</i> —Give the eligibility criteria, and the sources and methods of selection of participants. Describe methods of follow-up                                            | n.a.    |
|                           |         | <i>Case-control study</i> —Give the eligibility criteria, and the sources and methods of case ascertainment and control selection. Give the rationale for the choice of cases and controls | n.a.    |
|                           |         | <i>Cross-sectional study</i> —Give the eligibility criteria, and the sources and methods of selection of participants                                                                      | 4 to 6  |
|                           |         | (b) <i>Cohort study</i> —For matched studies, give matching criteria and number of exposed and unexposed                                                                                   | n.a.    |
|                           |         | <i>Case-control study</i> —For matched studies, give matching criteria and the number of controls per case                                                                                 | n.a.    |
| Variables                 | 7       | Clearly define all outcomes, exposures, predictors, potential confounders, and effect modifiers. Give diagnostic criteria, if applicable                                                   | 5 to 6  |
| Data sources/measurement  | 8*      | For each variable of interest, give sources of data and details of methods of assessment (measurement). Describe comparability of assessment methods if there is more than one group       | 5 to 6  |
| Bias                      | 9       | Describe any efforts to address potential sources of bias                                                                                                                                  | 5       |
| Study size                | 10      | Explain how the study size was arrived at                                                                                                                                                  | 5       |
| Quantitative variables    | 11      | (a) Describe all statistical methods, including those used to control for confounding                                                                                                      | 6       |
|                           |         | (b) Describe any methods used to examine subgroups and interactions                                                                                                                        | n.a.    |
|                           |         | (c) Explain how missing data were addressed                                                                                                                                                | 5       |
|                           |         | (d) <i>Cohort study</i> —If applicable, explain how loss to follow-up was addressed                                                                                                        | n.a.    |
|                           |         | <i>Case-control study</i> —If applicable, explain how matching of cases and controls was addressed                                                                                         | n.a.    |
| Statistical methods       | 12      | <i>Cross-sectional study</i> —If applicable, describe analytical methods taking account of sampling strategy                                                                               | n.a.    |
|                           |         | (e) Describe any sensitivity analyses                                                                                                                                                      | 6       |

Continued on next page

1  
2  
3  
4  
5  
6  
7  
8  
9  
10  
11  
12  
13  
14  
15  
16  
17  
18  
19  
20  
21  
22  
23  
24  
25  
26  
27  
28  
29  
30  
31  
32  
33  
34  
35  
36  
37  
38  
39  
40  
41  
42  
43  
44  
45  
46  
47  
48  
49  
50  
51  
52  
53  
54  
55  
56  
57  
58  
59  
60**Results**

|                          |     |                                                                                                                                                                                                              |        |
|--------------------------|-----|--------------------------------------------------------------------------------------------------------------------------------------------------------------------------------------------------------------|--------|
| Participants             | 13* | (a) Report numbers of individuals at each stage of study—eg numbers potentially eligible, examined for eligibility, confirmed eligible, included in the study, completing follow-up, and analysed            | 5      |
|                          |     | (b) Give reasons for non-participation at each stage                                                                                                                                                         | 5      |
|                          |     | (c) Consider use of a flow diagram                                                                                                                                                                           | n.a.   |
| Descriptive data         | 14* | (a) Give characteristics of study participants (eg demographic, clinical, social) and information on exposures and potential confounders                                                                     | 6      |
|                          |     | (b) Indicate number of participants with missing data for each variable of interest                                                                                                                          | 5      |
|                          |     | (c) <i>Cohort study</i> —Summarise follow-up time (eg, average and total amount)                                                                                                                             | n.a.   |
| Outcome data             | 15* | <i>Cohort study</i> —Report numbers of outcome events or summary measures over time                                                                                                                          | n.a.   |
|                          |     | <i>Case-control study</i> —Report numbers in each exposure category, or summary measures of exposure                                                                                                         | n.a.   |
|                          |     | <i>Cross-sectional study</i> —Report numbers of outcome events or summary measures                                                                                                                           | 6      |
| Main results             | 16  | (a) Give unadjusted estimates and, if applicable, confounder-adjusted estimates and their precision (eg, 95% confidence interval). Make clear which confounders were adjusted for and why they were included | 7      |
|                          |     | (b) Report category boundaries when continuous variables were categorized                                                                                                                                    | 6      |
|                          |     | (c) If relevant, consider translating estimates of relative risk into absolute risk for a meaningful time period                                                                                             | n.a.   |
| Other analyses           | 17  | Report other analyses done—eg analyses of subgroups and interactions, and sensitivity analyses                                                                                                               | 8      |
| <b>Discussion</b>        |     |                                                                                                                                                                                                              |        |
| Key results              | 18  | Summarise key results with reference to study objectives                                                                                                                                                     | 8      |
| Limitations              | 19  | Discuss limitations of the study, taking into account sources of potential bias or imprecision. Discuss both direction and magnitude of any potential bias                                                   | 8      |
| Interpretation           | 20  | Give a cautious overall interpretation of results considering objectives, limitations, multiplicity of analyses, results from similar studies, and other relevant evidence                                   | 8 to 9 |
| Generalisability         | 21  | Discuss the generalisability (external validity) of the study results                                                                                                                                        | 10     |
| <b>Other information</b> |     |                                                                                                                                                                                                              |        |
| Funding                  | 22  | Give the source of funding and the role of the funders for the present study and, if applicable, for the original study on which the present article is based                                                | 12     |

\*Give information separately for cases and controls in case-control studies and, if applicable, for exposed and unexposed groups in cohort and cross-sectional studies.

**Note:** An Explanation and Elaboration article discusses each checklist item and gives methodological background and published examples of transparent reporting. The STROBE checklist is best used in conjunction with this article (freely available on the Web sites of PLoS Medicine at <http://www.plosmedicine.org/>, Annals of Internal Medicine at <http://www.annals.org/>, and Epidemiology at <http://www.epidem.com/>). Information on the STROBE Initiative is available at [www.strobe-statement.org](http://www.strobe-statement.org).
