# Supplementary material for: The association between the use of biomedical services and the holistic use of traditional East Asian medicine: a national survey of outpatients in South Korea
Source: PubMed Central journal article supplement — BMJ Open. 2017 Dec 6;7(12):e018414. doi: 10.1136/bmjopen-2017-018414 (PMC5728304; doi:10.1136/bmjopen-2017-018414), 2017-12-06
Supplement: bmjopen-2017-018414supp001.pdf [file bmjopen-2017-018414supp001.pdf]

Table A1. The Replication of Table 3 in Negative Binomial Regression Models

|                                                   | Model 1 |             | Model 2 |             | Model 3 |              | Model 4 |              |
|---------------------------------------------------|---------|-------------|---------|-------------|---------|--------------|---------|--------------|
|                                                   | coeff.  | (95% CI)    | coeff.  | (95% CI)    | coeff.  | (95% CI)     | coeff.  | (95% CI)     |
| Biomedical Service Use                            | 0.06**  | (0.02-0.10) | 0.04*   | (0.01-0.08) | 0.05**  | (0.02-0.09)  | 0.04*   | (0.01-0.08)  |
| EM Use Frequency (Ref = 1 to 3 times)             |         |             |         |             |         |              |         |              |
| 4 to 10 times                                     |         |             | 0.19*** | (0.14-0.23) |         |              | 0.18*** | (0.14-0.23)  |
| 11 to 30 times                                    |         |             | 0.27*** | (0.22-0.32) |         |              | 0.28*** | (0.22-0.33)  |
| 31 or more times                                  |         |             | 0.27*** | (0.20-0.35) |         |              | 0.28*** | (0.21-0.36)  |
| Self-Rated Health Status (Ref = Very good)        |         |             |         |             |         |              |         |              |
| Very bad                                          |         |             |         |             | -0.02   | (-0.18-0.14) | -0.11   | (-0.27-0.06) |
| Bad                                               |         |             |         |             | 0.06    | (-0.06-0.17) | -0.02   | (-0.14-0.10) |
| Fair                                              |         |             |         |             | 0.02    | (-0.09-0.13) | -0.04   | (-0.15-0.08) |
| Good                                              |         |             |         |             | -0.02   | (-0.13-0.10) | -0.05   | (-0.17-0.07) |
| Female                                            |         |             |         |             |         |              | 0.02    | (-0.02-0.06) |
| Age (Ref = less than 20)                          |         |             |         |             |         |              |         |              |
| 20s or 30s                                        |         |             |         |             |         |              | 0.24*** | (0.10-0.38)  |
| 40s                                               |         |             |         |             |         |              | 0.26*** | (0.11-0.41)  |
| 50s                                               |         |             |         |             |         |              | 0.25*** | (0.10-0.39)  |
| 60s                                               |         |             |         |             |         |              | 0.21**  | (0.05-0.36)  |
| 70s                                               |         |             |         |             |         |              | 0.18*   | (0.03-0.33)  |
| 80s or more                                       |         |             |         |             |         |              | 0.17    | (-0.01-0.35) |
| Marital Status (Ref = Single)                     |         |             |         |             |         |              |         |              |
| Married                                           |         |             |         |             |         |              | 0.03    | (-0.04-0.10) |
| Widowed/Divorced/Separated                        |         |             |         |             |         |              | 0.03    | (-0.06-0.13) |
| Others                                            |         |             |         |             |         |              | -0.02   | (-0.32-0.28) |
| Education (Ref = No formal education)             |         |             |         |             |         |              |         |              |
| Elementary school                                 |         |             |         |             |         |              | 0.00    | (-0.09-0.09) |
| Middle school                                     |         |             |         |             |         |              | -0.02   | (-0.12-0.08) |
| High school                                       |         |             |         |             |         |              | -0.01   | (-0.11-0.09) |
| College or graduate school                        |         |             |         |             |         |              | -0.02   | (-0.12-0.09) |
| Household Income (Ref = less than 1 million wons) |         |             |         |             |         |              |         |              |
| 1 to 1.9 million wons                             |         |             |         |             |         |              | 0.01    | (-0.06-0.07) |
| 2 to 2.9 million wons                             |         |             |         |             |         |              | -0.00   | (-0.07-0.06) |
| 3 to 3.9 million wons                             |         |             |         |             |         |              | 0.00    | (-0.07-0.08) |
| 4 to 4.9 million wons                             |         |             |         |             |         |              | 0.02    | (-0.06-0.10) |
| 5 million wons or more                            |         |             |         |             |         |              | 0.04    | (-0.05-0.12) |
| Constant                                          | 1.04*** | (1.01-1.06) | 0.89*** | (0.85-0.93) | 1.02*** | (0.91-1.13)  | 0.67*** | (0.49-0.85)  |
| Observations                                      |         | 3,861       |         | 3,861       |         | 3,861        |         | 3,861        |

Note: significant at 0.05 (\*), 0.01 (\*\*), 0.001 (\*\*\*).
